# Supplementary material
Source: publisher figshare collection journal article supplement (https://karger.figshare.com/articles/dataset/_/4929773)
Supplement: Supplementary file 1 [file 1]

Archive with 6 entries (6 files):
- IAA464324_SupplLegends.docx.doc
- IAA464324_SupplReferences.docx
- IAA464324_TableS1.PDF
- IAA464324_TableS2.docx
- IAA464324_TableS3.docx
- IAA464324_TableS4.docx
