# Supplementary material
Source: publisher figshare collection journal article supplement (https://karger.figshare.com/articles/dataset/_/4929773)
Supplement: Supplementary file 1 [file 1 › IAA464324_SupplReferences.docx]

**Supplementary References**

S1 Ahn K, Kim J, Kwon HJ, Chae Y, Hahm MI, Lee KJ, Park YM, Lee SY, Han M, Kim WK: The prevalence of symptoms of asthma, allergic rhinoconjunctivitis, and eczema in korean children: Nationwide cross-sectional survey using complex sampling design. [korean]. Journal of the Korean Medical Association 2011;54:769-778.

S2 Al-Riyami BM, Al-Rawas OA, Al-Riyami AA, Jasim LG, Mohammed AJ: A relatively high prevalence and severity of asthma, allergic rhinitis and atopic eczema in schoolchildren in the sultanate of oman. Respirology (Carlton, Vic) 2003;8:69-76.

S3 Amarasekera ND, Gunawardena NK, de Silva NR, Weerasinghe A: Prevalence of childhood atopic diseases in the western province of sri lanka. The Ceylon medical journal 2010;55:5-8.

S4 Annesi-Maesano I, Hulin M, Lavaud F, Raherison C, Kopferschmitt C, de Blay F, Charpin DA, Denis C: Poor air quality in classrooms related to asthma and rhinitis in primary schoolchildren of the french 6 cities study. Thorax 2012;67:682-688.

S5 Anthracopoulos MB, Antonogeorgos G, Liolios E, Triga M, Panagiotopoulou E, Priftis KN: Increase in chronic or recurrent rhinitis, rhinoconjunctivitis and eczema among schoolchildren in greece: Three surveys during 1991-2003. Pediatric allergy and immunology: official publication of the European Society of Pediatric Allergy and Immunology 2009;20:180-186.

S6 Arnedo-Pena A, Garcia-Marcos L, Garcia Hernandez G, Aguinagua Ontoso I, Gonzalez Diaz C, Morales Suarez-Varela M, Dominguez Aurrecoechea B, Busquets Monge R, Blanco Quiros A, Batlles Garrido J, Miner Kanflanka I, Lopez-Silvarrey Varela A: Time trends and geographical variations in the prevalence of symptoms of allergic rhinitis in 6-7-year-old children from eight areas of spain according to the isaac. [spanish] tendencia temporal y variaciones geograficas de la prevalencia de sintomas de rinitis alergica en escolares de 6-7 anos de ocho areas espanolas, segun el isaac. Anales de Pediatria 2005;62:229-236.

S7 Backer C, Barraza-Villarrea A, Moreno-Macfas H, Escamilla-Nunez C, Romieru EI: The effects of a rural environment on the prevalence of allergic rhinitis among schoolchildren in mexicali, baja california, mexico. [spanish] efecto del ambiente rural sobre la prevalencia de rinitis alergica en escolares de mexicali, baja california, mexico. Revista Panamericana de Salud Publica/Pan American Journal of Public Health 2009;25:431-437.

S8 Castro LK, Cerci Neto A, Ferreira Filho OF: Prevalence of symptoms of asthma, rhinitis and atopic eczema among students between 6 and 7 years of age in the city of londrina, brazil. Jornal brasileiro de pneumologia: publicacao oficial da Sociedade Brasileira de Pneumologia e Tisilogia 2010;36:286-292.

S9 Dell SD, Foty RG, Gilbert NL, Jerrett M, To T, Walter SD, Stieb DM: Asthma and allergic disease prevalence in a diverse sample of toronto school children: Results from the toronto child health evaluation questionnaire (t-cheq) study. Canadian Respiratory Journal 2010;17:e1-e6.

S10 Del-Rio-Navarro BE, Luna-Pech JA, Berber A, Zepeda-Ortega B, Avila-Castanon L, Del-Rio-Chivardi JM, Baeza-Bacab M, Sienra-Monge JJ: Factors associated with allergic rhinitis in children from northern mexico city. Journal of investigational allergology & clinical immunology 2007;17:77-84.

S11 Duggan EM, Sturley J, Fitzgerald AP, Perry IJ, Hourihane JO: The 2002-2007 trends of prevalence of asthma, allergic rhinitis and eczema in irish schoolchildren. Pediatric allergy and immunology: official publication of the European Society of Pediatric Allergy and Immunology 2012;23:464-471.

S12 Falade AG, Olawuyi JF, Osinusi K, Onadeko BO: Prevalence and severity of symptoms of asthma, allergic rhinoconjunctivitis, and atopic eczema in 6- to 7-year-old nigerian primary school children: The international study of asthma and allergies in childhood. Medical principles and practice : international journal of the Kuwait University, Health Science Centre 2004;13:20-25.

S13 Futamura M, Ohya Y, Akashi M, Adachi Y, Odajima H, Akiyama K, Akasawa A: Age-related prevalence of allergic diseases in tokyo schoolchildren. Allergology international : official journal of the Japanese Society of Allergology 2011;60:509-515.

S14 Garcia-Marcos L, Morales Suarez-Varela M, Miner Canflanca I, Batlles Garrido J, Blanco Quiros A, Lopez-Silvarrey Varela A, Garcia Hernandez G, Guillen-Grima F, Gonzalez Diaz C, Huerta Gonzalez I, Arnedo Pena A, Busquets Monge R: Bcg immunization at birth and atopic diseases in a homogeneous population of spanish schoolchildren. International archives of allergy and immunology 2005;137:303-309.

S15 Hahm MI, Chae Y, Kwon HJ, Kim J, Ahn K, Kim WK, Lee SY, Park YM, Han MY, Lee KJ, Lee HY, Min I: Do newly built homes affect rhinitis in children? The isaac phase iii study in korea. Allergy 2014;69:479-487.

S16 Higuchi O, Adachi Y, Itazawa T, Ito Y, Yoshida K, Ohya Y, Odajima H, Akasawa A, Miyawaki T: Relationship between rhinitis and nocturnal cough in school children. Pediatric allergy and immunology : official publication of the European Society of Pediatric Allergy and Immunology 2012;23:562-566.

S17 Hong S, Son DK, Lim WR, Kim SH, Kim H, Yum HY, Kwon H: The prevalence of atopic dermatitis, asthma, and allergic rhinitis and the comorbidity of allergic diseases in children. Environmental health and toxicology 2012;27:e2012006.

S18 Kahwa EK, Waldron NK, Younger NO, Edwards NC, Knight-Madden JM, Bailey KA, Wint YB, Lewis-Bell KN: Asthma and allergies in jamaican children aged 2-17 years: A cross-sectional prevalence survey. BMJ open 2012;2

S19 Kao CC, Huang JL, Ou LS, See LC: The prevalence, severity and seasonal variations of asthma, rhinitis and eczema in taiwanese schoolchildren. Pediatric allergy and immunology : official publication of the European Society of Pediatric Allergy and Immunology 2005;16:408-415.

S20 Kong WJ, Chen JJ, Zheng ZY, Shi QM, Zhou Y: Prevalence of allergic rhinitis in 3-6-year-old children in wuhan of china. Clinical and experimental allergy : journal of the British Society for Allergy and Clinical Immunology 2009;39:869-874.

S21 Kudzyte J, Griska E, Bojarskas J: Time trends in the prevalence of asthma and allergy among 6-7-year-old children. Results from isaac phase i and iii studies in kaunas, lithuania. Medicina (Kaunas, Lithuania) 2008;44:944-952.

S22 Kurosaka F, Terada T, Tanaka A, Nakatani Y, Yamada K, Nishikawa J, Oka K, Takahashi H, Mogami A, Yamada T, Nakano T, Shima M, Nishio H: Risk factors for wheezing, eczema and rhinoconjunctivitis in the previous 12 months among six-year-old children in himeji city, japan: Food allergy, older siblings, day-care attendance and parental allergy history. Allergology international : official journal of the Japanese Society of Allergology 2011;60:317-330.

S23 Levesque B, Rhainds M, Ernst P, Grenier AM, Kosatsky T, Audet N, Lajoie P: Asthma and allergic rhinitis in quebec children. Canadian respiratory journal : journal of the Canadian Thoracic Society 2004;11:343-348.

S24 Liao MF, Huang JL, Chiang LC, Wang FY, Chen CY: Prevalence of asthma, rhinitis, and eczema from isaac survey of schoolchildren in central taiwan. The Journal of asthma : official journal of the Association for the Care of Asthma 2005;42:833-837.

S25 Lima RG, Pastorino AC, Casagrande RR, Sole D, Leone C, Jacob CM: Prevalence of asthma, rhinitis and eczema in 6 - 7 years old students from the western districts of sao paulo city, using the standardized questionnaire of the "international study of asthma and allergies in childhood" (isaac)-phase iiib. Clinics (Sao Paulo, Brazil) 2007;62:225-234.

S26 Mavale-Manuel S, Joaquim O, Macome C, Almeida L, Nunes E, Daniel A, Malichocho J, Pedro A, Bandeira S, Eduardo E, Maciel L, Constance E, Marques S, Tembe A, de Blic J, Annesi-Maesano I: Asthma and allergies in schoolchildren of maputo. Allergy 2007;62:265-271.

S27 Maziak W, Behrens T, Brasky TM, Duhme H, Rzehak P, Weiland SK, Keil U: Are asthma and allergies in children and adolescents increasing? Results from isaac phase i and phase iii surveys in munster, germany. Allergy 2003;58:572-579.

S28 Mohammadzadeh I, Ghafari J, Savadkoohi RB, Tamaddoni A, Dooki MRE, Navaei RA: The prevalence of asthma, allergic rhinitis and eczema in north of iran: The international study of asthma and allergies in childhood (isaac). Iranian Journal of Pediatrics 2008;18:117-122.

S29 Montefort S, Muscat HA, Caruana S, Lenicker H: Allergic conditions in 5-8-year-old maltese schoolchildren: Prevalence, severity, and associated risk factors [isaac]. Pediatric allergy and immunology : official publication of the European Society of Pediatric Allergy and Immunology 2002;13:98-104.

S30 Morais-Almeida M, Santos N, Pereira AM, Branco-Ferreira M, Nunes C, Bousquet J, Fonseca JA: Prevalence and classification of rhinitis in preschool children in portugal: A nationwide study. Allergy 2013;68:1278-1288.

S31 Moyes CD, Clayton T, Pearce N, Asher MI, Ellwood P, Mackay R, Mitchell E, Pattemore P, Stewart AW, Crane J: Time trends and risk factors for rhinoconjunctivitis in new zealand children: An international study of asthma and allergies in childhood (isaac) survey. Journal of paediatrics and child health 2012;48:913-920.

S32 Nahhas M, Bhopal R, Anandan C, Elton R, Sheikh A: Prevalence of allergic disorders among primary school-aged children in madinah, saudi arabia: Two-stage cross-sectional survey. PloS one 2012;7:e36848.

S33 Okuda M: Epidemiology of japanese cedar pollinosis throughout japan. Annals of allergy, asthma & immunology: official publication of the American College of Allergy, Asthma, & Immunology 2003;91:288-296.

S34 Penaranda A, Aristizabal G, Garcia E, Vasquez C, Rodriguez-Martinez CE: Rhinoconjunctivitis prevalence and associated factors in school children aged 6-7 and 13-14 years old in bogota, colombia. International journal of pediatric otorhinolaryngology 2012;76:530-535.

S35 Peroni DG, Piacentini GL, Alfonsi L, Zerman L, Di Blasi P, Visona G, Nottegar F, Boner AL: Rhinitis in pre-school children: Prevalence, association with allergic diseases and risk factors. Clinical and experimental allergy : journal of the British Society for Allergy and Clinical Immunology 2003;33:1349-1354.

S36 Rad MH, Hamzezadeh A: Allergic disease in 6--7-year-old schoolchildren in urmia, islamic republic of iran. Eastern Mediterranean health journal = La revue de sante de la Mediterranee orientale = al-Majallah al-sihhiyah li-sharq al-mutawassit 2008;14:1044-1053.

S37 Sanchez-Lerma B, Morales-Chirivella FJ, Penuelas I, Blanco Guerra C, Mesa Lugo F, Aguinaga-Ontoso I, Guillen-Grima F: High prevalence of asthma and allergic diseases in children aged 6 to [corrected] 7 years from the canary islands. [corrected]. Journal of investigational allergology & clinical immunology 2009;19:383-390.

S38 Selnes A, Nystad W, Bolle R, Lund E: Diverging prevalence trends of atopic disorders in norwegian children. Results from three cross-sectional studies. Allergy 2005;60:894-899.

S39 Simoni M, Annesi-Maesano I, Sigsgaard T, Norback D, Wieslander G, Nystad W, Canciani M, Sestini P, Viegi G: School air quality related to dry cough, rhinitis and nasal patency in children. The European respiratory journal 2010;35:742-749.

S40 Soto-Quiros ME, Soto-Martinez M, Hanson LA: The high prevalence of rhinitis, rhinoconjunctivitis, and eczema in costa rican schoolchildren studied with the isaac protocol. Pediatric Asthma, Allergy and Immunology 2004;17:71-80.

S41 Suh M, Kim HH, Sohn MH, Kim KE, Kim C, Shin DC: Prevalence of allergic diseases among korean school-age children: A nationwide cross-sectional questionnaire study. Journal of Korean medical science 2011;26:332-338.

S42 Tai A, Volkmer R, Burton A: Prevalence of asthma symptoms and atopic disorders in preschool children and the trend over a decade. The Journal of asthma : official journal of the Association for the Care of Asthma 2009;46:343-346.

S43 Tamay Z, Akcay A, Ergin A, Guler N: Prevalence of allergic rhinitis and risk factors in 6- to 7-yearold children in istanbul, turkey. The Turkish journal of pediatrics 2014;56:31-40.

S44 Wang J, Li B, Yu W, Yang Q, Wang H, Huang D, Sundell J, Norback D: Rhinitis symptoms and asthma among parents of preschool children in relation to the home environment in chongqing, china. PloS one 2014;9:e94731.

S45 Wu WF, Wan KS, Wang SJ, Yang W, Liu WL: Prevalence, severity, and time trends of allergic conditions in 6-to-7-year-old schoolchildren in taipei. Journal of investigational allergology & clinical immunology 2011;21:556-562.

S46 Zhao TB, Wang HJ, Chen YZ, Xiao ML, Duo LK, Liu G, Lau YL, Karlberg J: Prevalence of childhood asthma, allergic rhinitis and eczema in urumqi and beijing. Journal of paediatrics and child health 2000;36:128-133.

S47 Al-Ghobain MO, Al-Moamary MS, Al-Hajjaj MS, Al-Fayez AI, Basha SI: Prevalence of rhinitis symptoms among 16 to 18 years old adolescents in saudi arabia. The Indian journal of chest diseases & allied sciences 2013;55:11-14.

S48 Amizadeh M, Safizadeh H, Bazargan N, Farrokhdoost Z: Survey on the prevalence of allergic rhinitis and its effect on the quality of high school students' life. Iranian journal of otorhinolaryngology 2013;25:79-84.

S49 Arnedo-Pena A, Garcia-Marcos L, Blanco-Quiros A, Gimeno AM, Ontoso IA, Diaz CG, Vazquez CD, Busquets-Monge R, Suarez-Varela MM, Garrido JB, Varela ALS, De Andoin NG: Time trends in prevalence of symptoms of allergic rhinitis in 13-14 year-old schoolchildren in 8 areas of spain between 1993-1994 and 2001-2002 according to the international study of asthma and allergies in childhood (isaac). [spanish] evolucion temporal de la prevalencia de sintomas de rinitis alergica en escolares de 13-14 anos de 8 areas espanolas entre 1993-1994 y 2001-2002 segun el estudio internacional sobre asma y alergias en la infancia (isaac). Medicina clinica 2004;123:490-495.

S50 Awadh Behbehani N, Abal A, Syabbalo NC, Abd Azeem A, Shareef E, Al-Momen J: Prevalence of asthma, allergic rhinitis, and eczema in 13- to 14-year-old children in kuwait: An isaac study. Annals of Allergy, Asthma and Immunology 2000;85:58-63.

S51 Brescianini S, Brunetto B, Iacovacci P, D'Ippolito C, Alberti G, Schirru MA, Stazi MA, Pini C, Di Felice G, Barletta B: Prevalence of self-perceived allergic diseases and risk factors in italian adolescents. Pediatric allergy and immunology: official publication of the European Society of Pediatric Allergy and Immunology 2009;20:578-584.

S52 Chiang LC, Chen YH, Hsueh KC, Huang JL: Prevalence and severity of symptoms of asthma, allergic rhinitis, and eczema in 10- to 15-year-old schoolchildren in central taiwan. Asian Pacific journal of allergy and immunology / launched by the Allergy and Immunology Society of Thailand 2007;25:1-5.

S53 Brito Rde C, da Silva GA, Motta ME, Brito MC: The association of rhinoconjunctivitis and asthma symptoms in adolescents. Revista portuguesa de pneumologia 2009;15:613-628.

S54 Droma Y, Kunii O, Yangzom Y, Shan M, Pingzo L, Song P: Prevalence and severity of asthma and allergies in schoolchildren in lhasa, tibet. Clinical and experimental allergy : journal of the British Society for Allergy and Clinical Immunology 2007;37:1326-1333.

S55 Fagan JK, Scheff PA, Hryhorczuk D, Ramakrishnan V, Ross M, Persky V: Prevalence of asthma and other allergic diseases in an adolescent population: Association with gender and race. Annals of allergy, asthma & immunology: official publication of the American College of Allergy, Asthma, & Immunology 2001;86:177-184.

S56 Graif Y, Garty BZ, Livne I, Green MS, Shohat T: Prevalence and risk factors for allergic rhinitis and atopic eczema among schoolchildren in israel: Results from a national study. Annals of allergy, asthma & immunology: official publication of the American College of Allergy, Asthma, & Immunology 2004;92:245-249.

S57 Kim SH, Kim YK, Lee MH, Hong SC, Bae JM, Min KU, Kim YY, Cho SH: Relationship between sensitization to citrus red mite (panonychus citri) and the prevalence of atopic diseases in adolescents living near citrus orchards. Clinical and experimental allergy : journal of the British Society for Allergy and Clinical Immunology 2002;32:1054-1058.

S58 Koffi N, Aka J, Nigue L, Kouassi B, Ngom A, Amon-Dick F, Nibaud A, Fadiga A, Aka-Danguy E: Prevalence of allergic diseases in childhood: Ivory coast isaac study, phase i. [french] prevalence des maladies allergiques de l'enfant: Resultats de l'enquete isaac - cote d'ivoire phase i. Revue Francaise d'Allergologie et d'Immunologie Clinique 2000;40:539-547.

S59 Luna Mde F, Almeida PC, Silva MG: [asthma and rhinitis prevalence and co-morbidity in 13-14-year-old schoolchildren in the city of fortaleza, ceara state, brazil]. Cadernos de saude publica 2011;27:103-112.

S60 Mercer MJ, Joube G, Ehrlich RI, Nelson H, Poyser MA, Puterman A, Weinberg EG: Socioeconomic status and prevalence of allergic rhinitis and atopic eczema symptoms in young adolescents. Pediatric Allergy and Immunology 2004;15:234-241.

S61 Munivrana H, Vorko-Jovic A, Munivrana S, Kursar M, Medlobi-Gluhak M, Vlahek P: The prevalence of allergic diseases among croatian school children according to the isaac phase one questionnaire. Medical science monitor : international medical journal of experimental and clinical research 2007;13:Cr505-509.

S62 Musharrafieh U, Al-Sahab B, Zaitoun F, El-Hajj MA, Ramadan F, Tamim H: Prevalence of asthma, allergic rhinitis and eczema among lebanese adolescents. The Journal of asthma : official journal of the Association for the Care of Asthma 2009;46:382-387.

S63 Narayana PP, Prasanna MP, Narahari SR, Guruprasad AM: Prevalence of asthma in school children in rural india. Annals of Thoracic Medicine 2010;5:118-119.

S64 Nordvall SL, Janson C, Kalm-Stephens P, Foucard T, Toren K, Alving K: Exhaled nitric oxide in a population-based study of asthma and allergy in schoolchildren. Allergy 2005;60:469-475.

S65 Owayed A, Behbehani N, Al-Momen J: Changing prevalence of asthma and allergic diseases among kuwaiti children. An isaac study (phase iii). Medical principles and practice : international journal of the Kuwait University, Health Science Centre 2008;17:284-289.

S66 Pac-Sa MR, Museros-Recatala L, Arnedo-Pena A, Bellido-Blasco JB, Puig-Barbera J, Artero-Sivera A, Campos-Cruanes JB, Aguinaga-Ontoso I: Risk factors for symptoms of allergic rhinitis in adolescents in castellon, spain. [spanish] factores de riesgo de sintomas de rinitis alergica en adolescentes de castellon, espana. Revista Panamericana de Salud Publica/Pan American Journal of Public Health 2008;23:333-340.

S67 Porto Neto AC, D'Agostini Annes R, Wolff NMM, Klein AP, Dos Santos FC, Dullius JL, Gressler M, Muller LS, Angonese CF, Menna-Barreto S: Prevalence and severity of asthma, rhinitis, and atopic eczema in 13- to 14-year-old schoolchildren from southern brazil. Allergy, Asthma and Clinical Immunology 2006;2:3-10.

S68 Riguera D, Andre PA, Zanetta DM: Sugar cane burning pollution and respiratory symptoms in schoolchildren in monte aprazivel, southeastern brazil. Revista de saude publica 2011;45:878-886.

S69 Shamssain MH, Shamsian N: Prevalence and severity of asthma, rhinitis, and atopic eczema in 13- to 14-year-old schoolchildren from the northeast of england. Annals of allergy, asthma & immunology : official publication of the American College of Allergy, Asthma, & Immunology 2001;86:428-432.

S70 Sugiyama K, Sugiyama T, Toda M, Yukawa T, Makino S, Fukuda T: Prevalence of asthma, rhinitis and eczema among 13-14-year-old schoolchildren in tochigi, japan. Allergology International 2000;49:205-211.

S71 Tamay Z, Akcay A, Ergin A, Guler N: Effects of dietary habits and risk factors on allergic rhinitis prevalence among turkish adolescents. International journal of pediatric otorhinolaryngology 2013;77:1416-1423.

S72 Toledo MF, Rozov T, Leone C: Prevalence of asthma and allergies in 13- to 14-year-old adolescents and the frequency of risk factors in carriers of current asthma in taubate, sao paulo, brazil. Allergologia et immunopathologia 2011;39:284-290.

S73 Wang HY, Pizzichini MM, Becker AB, Duncan JM, Ferguson AC, Greene JM, Rennie DC, Senthilselvan A, Taylor BW, Sears MR: Disparate geographic prevalences of asthma, allergic rhinoconjunctivitis and atopic eczema among adolescents in five canadian cities. Pediatric allergy and immunology : official publication of the European Society of Pediatric Allergy and Immunology 2010;21:867-877.

S74 Yan DC, Ou LS, Tsai TL, Wu WF, Huang JL: Prevalence and severity of symptoms of asthma, rhinitis, and eczema in 13- to 14-year-old children in taipei, taiwan. Annals of allergy, asthma & immunology : official publication of the American College of Allergy, Asthma, & Immunology 2005;95:579-585.

S75 Zar HJ, Ehrlich RI, Workman L, Weinberg EG: The changing prevalence of asthma, allergic rhinitis and atopic eczema in african adolescents from 1995 to 2002. Pediatric allergy and immunology : official publication of the European Society of Pediatric Allergy and Immunology 2007;18:560-565.

S76 Bjerg A, Ekerljung L, Middelveld R, Dahlen SE, Forsberg B, Franklin K, Larsson K, Lotvall J, Olafsdottir IS, Toren K, Lundback B, Janson C: Increased prevalence of symptoms of rhinitis but not of asthma between 1990 and 2008 in swedish adults: Comparisons of the ecrhs and ga(2)len surveys. PloS one 2011;6:e16082.

S77 Desalu OO, Salami AK, Iseh KR, Oluboyo PO: Prevalence of self reported allergic rhinitis and its relationship with asthma among adult nigerians. Journal of investigational allergology & clinical immunology 2009;19:474-480.

S78 Filipiak B, Heinrich J, Nowak D, Wichmann HE: The distribution in specific ige and the prevalence of allergic symptoms in 25-64-years old inhabitants of an eastern and a western german city--results from augsburg and erfurt. European journal of epidemiology 2001;17:77-84.

S79 Hannaford PC, Simpson JA, Bisset AF, Davis A, McKerrow W, Mills R: The prevalence of ear, nose and throat problems in the community: Results from a national cross-sectional postal survey in scotland. Family practice 2005;22:227-233.

S80 Klossek JM, Annesi-Maesano I, Pribil C, Didier A: [instant: National survey of allergic rhinitis in a french adult population based-sample]. Presse medicale (Paris, France : 1983) 2009;38:1220-1229.

S81 Konno S, Hizawa N, Fukutomi Y, Taniguchi M, Kawagishi Y, Okada C, Tanimoto Y, Takahashi K, Akasawa A, Akiyama K, Nishimura M: The prevalence of rhinitis and its association with smoking and obesity in a nationwide survey of japanese adults. Allergy 2012;67:653-660.

S82 Kurt E, Metintas S, Basyigit I, Bulut I, Coskun E, Dabak S, Deveci F, Fidan F, Kaynar H, Kunt Uzaslan E, Onbasi K, Ozkurt S, Pasaoglu Karakis G, Sahan S, Sahin U, Oguzulgen K, Yildiz F, Mungan D, Yorgancioglu A, Gemicioglu B, Fuat Kalyoncu A: Prevalence and risk factors of allergies in turkey (parfait): Results of a multicentre cross-sectional study in adults. The European respiratory journal 2009;33:724-733.

S83 Lindgren A, Stroh E, Nihlen U, Montnemery P, Axmon A, Jakobsson K: Traffic exposure associated with allergic asthma and allergic rhinitis in adults. A cross-sectional study in southern sweden. International journal of health geographics 2009;8:25.

S84 Morais-Almeida M, Pite H, Pereira AM, Todo-Bom A, Nunes C, Bousquet J, Fonseca J: Prevalence and classification of rhinitis in the elderly: A nationwide survey in portugal. Allergy: European Journal of Allergy and Clinical Immunology 2013;68:1150-1157.

S85 Song WJ, Kim MY, Jo EJ, Kim MH, Kim TH, Kim SH, Kim KW, Cho SH, Min KU, Chang YS: Rhinitis in a community elderly population: Relationships with age, atopy, and asthma. Annals of allergy, asthma & immunology : official publication of the American College of Allergy, Asthma, & Immunology 2013;111:347-351.

S86 Sonomjamts M, Dashdemberel S, Logii N, Nakae K, Chigusa Y, Ohhira S, Ito C, Sagara H, Makino S: Prevalence of asthma and allergic rhinitis among adult population in ulaanbaatar, mongolia. Asia Pacific allergy 2014;4:25-31.
