# Supplementary material
Source: publisher figshare collection journal article supplement (https://karger.figshare.com/articles/dataset/_/4929773)
Supplement: Supplementary file 1 [file 1 › IAA464324_TableS1.PDF]

**Table S1. Characteristics of the included studies assessing prevalence of rhinitis before puberty (<11y)**

| Study Ref<br>(N=46)                | Country   | Sampling method                                                                                                                                                                                                                                                                                                                                                                                                                                                                                                                                                                                             | Residency   | Method<br>for<br>assessing<br>PR | Sample<br>analysed | Study<br>period | Rhinitis                |                         |
|------------------------------------|-----------|-------------------------------------------------------------------------------------------------------------------------------------------------------------------------------------------------------------------------------------------------------------------------------------------------------------------------------------------------------------------------------------------------------------------------------------------------------------------------------------------------------------------------------------------------------------------------------------------------------------|-------------|----------------------------------|--------------------|-----------------|-------------------------|-------------------------|
|                                    |           |                                                                                                                                                                                                                                                                                                                                                                                                                                                                                                                                                                                                             |             |                                  |                    |                 | M (%)                   | F (%)                   |
| Ahn et al <sup>S1</sup>            | Korea     | Children from 1st year of elementary (6292 schools) and middle school (3137 schools) were chosen from a random sample of 45 primary and 40 middle schools across the nation (7 metropolitan regions and 9 provinces).                                                                                                                                                                                                                                                                                                                                                                                       | Rural/Urban | ISAAC Q                          | 8115               | 2010            | 6-7y<br>429/1958 (21.9) | 6-7y<br>305/1931 (15.8) |
| Al-Riyami et al <sup>S2</sup>      | Oman      | A nationwide sample of public schools were chosen for conducting the stratified multistage sampling method, using the 10 health regions of Oman as a strata. The first stage of sampling consisted of randomly selecting schools as primary sample units from each health region. In the second stage, one class was chosen randomly from each school as the secondary sample unit with participation of all children in the selected class. The total national target sample was distributed among the 10 regions of the country using the proportion allocation method.                                   | U/NR        | ISAAC Q                          | 3893               | -               | 6-7y<br>263/1624 (16.2) | 6-7y<br>209/1550 (13.5) |
| Amarasekera et al <sup>S3</sup>    | Sri Lanka | Children in the fifth grade of school, attending 17 state schools in the 3 districts of the Western Province of Sri Lanka. Participating schools were selected by multi-stage stratified randomisation. In the first stage, stratification was done by type of schools recognised by the Ministry of Education. In the second stage, schools of each type were randomly selected from rural and urban areas, in proportion to the size of the urban and rural populations of the province. In the third stage, in each selected school, one class in Grade 5 was randomly selected as the study population. | Rural/Urban | ISAAC Q                          | 511                | 2006            | 10y<br>67/277 (24.2)    | 10y<br>37/234 (15.8)    |
| Annesi-Maesano et al <sup>S4</sup> | France    | Recruited schoolchildren (9-10 years) from unclear sample "including 6 cities", "401 randomly chosen classrooms in 108 primary schools attended by 6590 children"                                                                                                                                                                                                                                                                                                                                                                                                                                           | Urban       | ISAAC Q                          | 6590               | -               | 9-10y<br>(13.1)         | 9-10y<br>(10.7)         |

|                                    |        |                                                                                                                                                                                                                                                                                                                                                                                           |             |                                                          |       |      |                              |                              |
|------------------------------------|--------|-------------------------------------------------------------------------------------------------------------------------------------------------------------------------------------------------------------------------------------------------------------------------------------------------------------------------------------------------------------------------------------------|-------------|----------------------------------------------------------|-------|------|------------------------------|------------------------------|
| Anthracopoulos et al <sup>S5</sup> | Greece | 3 separate cross-sectional surveys of 8-10 year old children. Identical methodology in the targeting, distribution and collection of the parental questionnaire.                                                                                                                                                                                                                          | Urban       | Other Q<br>“Current” refers to<br>“in the last 2 years”. | 2417  | 1991 | 8-10y<br>64/1181 (5.4)       | 8-10y<br>59/1236 (4.8)       |
|                                    |        |                                                                                                                                                                                                                                                                                                                                                                                           |             |                                                          | 3076  | 1998 | 8-10y<br>97/1507 (6.4)       | 8-10y<br>104/1569 (6.6)      |
|                                    |        |                                                                                                                                                                                                                                                                                                                                                                                           |             |                                                          | 2725  | 2003 | 8-10y<br>113/1337 (8.5)      | 8-10y<br>104/1388 (7.5)      |
| Arnedo-Pena et al <sup>S6</sup>    | Spain  | Phase III (2001-2002) included schoolchildren from 8 centres (Asturias, Barcelona, Bilbao, Pamplona, Madrid, Castellon, Valencia, Cartagena) and results were compared with phase I (1993-1994). In 3 centres schools were selected by simple randomisation, and the rest of the centres included all the schools in the area.                                                            | Rural/Urban | ISAAC Q                                                  | 24862 | 2002 | 6-7 y<br>2297/12418 (18.5)   | 6-7 y<br>1991/12444 (16.1)   |
| Backer et al <sup>S7</sup>         | Mexico | A population-based cross-sectional study was performed by applying a standardized questionnaire to a random sample of 2087 school children 6-7 years old living in the city of Mexicali, capital of Baja California, north of Mexico. 55 schools were randomly selected among all elementary schools of Mexicali.                                                                         | Rural/Urban | ISAAC Q                                                  | 2087  | 2004 | 6-7 y<br>294/1009 (29.1)     | 6-7 y<br>227/1078 (21.1)     |
| Castro et al <sup>S8</sup>         | Brazil | The study target population consisted of public school students aged from 6 to 7 years living in the city of Londrina, Brazil. They selected 38 schools, distributed proportionally among the five regions of the city: northern; southern; eastern; western; and downtown. All children in the established age range enrolled in these schools were invited to participate in the study. | Urban       | ISAAC Q                                                  | 3600  | 2008 | 6-7y<br>547/1837 (29.8)      | 6-7y<br>437/1763 (24.8)      |
| Dell et al <sup>S9</sup>           | Canada | Schools were selected by use of a random number generator from a pool of 556 eligible schools within the two publicly funded school boards in Toronto (Toronto District School Board and the Toronto Catholic District School Board).                                                                                                                                                     | Urban       | ISAAC Q                                                  | 5619  | 2006 | Mean 6.7y<br>679/2772 (24.5) | Mean 6.7y<br>613/3347 (18.3) |

|                                      |         |                                                                                                                                                                                                                                                                                                                                                                                                                                                                                                                                 |             |                 |        |      |                                                           |                                                           |
|--------------------------------------|---------|---------------------------------------------------------------------------------------------------------------------------------------------------------------------------------------------------------------------------------------------------------------------------------------------------------------------------------------------------------------------------------------------------------------------------------------------------------------------------------------------------------------------------------|-------------|-----------------|--------|------|-----------------------------------------------------------|-----------------------------------------------------------|
| Del-Rio-Navarro et al <sup>S10</sup> | Mexico  | A total of 50 elementary and 27 high schools were sampled which were randomly selected in the four participating city precincts (Miguel Hidalgo, Azcapotzalco, Gustavo A Madero, and Venustiano Carranza).                                                                                                                                                                                                                                                                                                                      | Urban       | ISAAC Q         | 4016   | 2005 | 6-7y<br>1001/2098 (47.7)                                  | 6-7y<br>873/2008 (43.5)                                   |
| Duggan et al <sup>S11</sup>          | Ireland | Two cross-sectional studies were performed 5 yr apart (2002 and 2007), in the same 24 randomly selected state primary schools in Cork (city and suburbs). Both cross-sectional studies were carried out in the same season and used identical methodology.                                                                                                                                                                                                                                                                      | Urban       | ISAAC Q         | 1474   | 2002 | 6-9y<br>197/699 (28.2)                                    | 6-9y<br>189/775 (24.4)                                    |
|                                      |         |                                                                                                                                                                                                                                                                                                                                                                                                                                                                                                                                 |             |                 | 1535   | 2007 | 6-9y<br>237/795 (29.8)                                    | 6-9y<br>176/740 (23.8)                                    |
|                                      |         |                                                                                                                                                                                                                                                                                                                                                                                                                                                                                                                                 |             |                 | 1648   | 1995 | 6-7y<br>85/844 (10.1)                                     | 6-7y<br>86/804 (10.7)                                     |
| Falade et al <sup>S12</sup>          | Nigeria | 31 primary schools were randomly selected from a total of 272 primary schools in Ibadan (one of the most densely populated cities in Africa), and 2,325 children aged 6–7 years were selected from grades 1 and 2.                                                                                                                                                                                                                                                                                                              | Urban       |                 |        |      |                                                           |                                                           |
| Futamura et al <sup>S13</sup>        | Japan   | Setagaya is located in the center of Tokyo. The study covered all 9 grades from 64 public elementary schools and 31 public junior high schools, with approximately 80% of the children attending these public schools.                                                                                                                                                                                                                                                                                                          | Urban       | ISAAC Q         | 27 917 | 2005 | 6y: 21.2<br>7y: 23.1<br>8y: 26.3<br>9y: 27.1<br>10y: 35.6 | 6y: 17.7<br>7y: 22.3<br>8y: 23.9<br>9y: 25.4<br>10y: 34.5 |
| Garcia-Marcos et al <sup>S14</sup>   | Spain   | The cities of Bilbao, San Sebastian and La Coruña included all schools within the city district. Asturias (a province) included a random sample of schools.                                                                                                                                                                                                                                                                                                                                                                     | Rural/Urban | ISAAC Q         | 9590   | 2002 | 6-7y<br>540/4733 (11.4)                                   | 6-7y<br>393/4847 (8.1)                                    |
| Hahm et al <sup>S15</sup>            | Korea   | The sampling method was a stratified two-stage cluster sampling design, based on a comprehensive national list of schools at the time. First, schools were stratified by geographical region and school location (metropolitan, urban, rural). For each stratum, sample schools were selected using a systematic ‘probability proportional to size’ (PPS) sampling procedure. In the second stage, three classes were selected randomly from the first grade of each sample school, and all students were asked to participate. | Rural/Urban | ISAAC Q and SPT | 3804   | 2010 | 6-7y<br>AR: 523/1923 (27.2)<br>NAR: 927/1923 (48.2)       | 6-7y<br>AR: 319/1881 (17.0)<br>NAR: 723/1881 (38.5)       |

|                              |         |                                                                                                                                                                                                                                                                                                                                                                                                                                                                            |             |                                                                                 |         |      |                                                                            |                                                                         |
|------------------------------|---------|----------------------------------------------------------------------------------------------------------------------------------------------------------------------------------------------------------------------------------------------------------------------------------------------------------------------------------------------------------------------------------------------------------------------------------------------------------------------------|-------------|---------------------------------------------------------------------------------|---------|------|----------------------------------------------------------------------------|-------------------------------------------------------------------------|
| Higuchi et al <sup>S16</sup> | Japan   | To ensure nationwide representation, schools were randomly selected from all prefectures. The total number of children recruited was 179,218, approximately 2% of the pediatric population, according to data from the National Institute of Population and Social Security Research.                                                                                                                                                                                      | Rural/Urban | ISAAC Q                                                                         | 139 506 | 2008 | 6-7y<br>10592/21861<br>(48.5)                                              | 6-7y<br>8338/21013<br>(39.7)                                            |
| Hong et al <sup>S17</sup>    | Korea   | This study enrolled 38,201 children between 0 and 13 years of age from 34 elementary schools and 136 children's daycare centers to participate in the 'Seoul Atopy Friendly School'.                                                                                                                                                                                                                                                                                       | Urban       | ISAAC Q                                                                         | 31 201  | 2010 | 0-9y<br>4016/9825<br>(40.9)                                                | 0-9y<br>3083/9410<br>(32.8)                                             |
| Kahwa et al <sup>S18</sup>   | Jamaica | Stratified, multistage cluster sampling design using enumeration districts (EDs) as primary sampling units. Briefly, in stage 1, a random sample of EDs was selected proportional to parish size and independently from both urban and rural EDs. Stage 2 involved the selection of households using systematic probability sampling. The Kish selection table <sup>7</sup> was used to select one eligible child per household in stage 3 yielding a sample size of 2017. | Rural/Urban | ISAAC Q                                                                         | 2017    | 2007 | 6-7y<br>25/138 (18.1)                                                      | 6-7y<br>10/130 (7.7)                                                    |
| Kao et al <sup>S19</sup>     | Taiwan  | The area studied was Taoyuan County, northern Taiwan. First-grade children (aged 6–8) or eighth-grade (aged 13–15) children were recruited. One-stage stratified cluster random sampling was used in this study.                                                                                                                                                                                                                                                           | U/NR        | ISAAC Q                                                                         | 6190    | 2002 | 6-8y<br>626/1546 (40.5)                                                    | 6-8y<br>491/1533 (32.0)                                                 |
| Kong et al <sup>S20</sup>    | China   | Sixteen kindergartens located in the urban area of Wuhan were randomly selected from the complete sampling frame of all kindergartens in the area. In each kindergarten, three classes were randomly selected from the three grades (top, middle and bottom grade).                                                                                                                                                                                                        | Urban       | Authors designed a Q that was checked by experts of rhinology and epidemiology. | 1211    | 2005 | 3-6y<br>Rhinitis<br>28.4 (24.9-31.8)<br>Rhinitis + SPT<br>13.0 (10.4-15.6) | 3-6y<br>Rhinitis<br>25.6 (22.0-29.2)<br>Rhinitis + SPT<br>7.7 (5.5-9.9) |

|                               |           |                                                                                                                                                                                                                                                                                                                                                                                                                                                                                                                                                                               |             | Based on<br>ISAAC Q<br>and SPT. |        |           |                             |                            |
|-------------------------------|-----------|-------------------------------------------------------------------------------------------------------------------------------------------------------------------------------------------------------------------------------------------------------------------------------------------------------------------------------------------------------------------------------------------------------------------------------------------------------------------------------------------------------------------------------------------------------------------------------|-------------|---------------------------------|--------|-----------|-----------------------------|----------------------------|
| Kudzyte et al <sup>S21</sup>  | Lithuania | Repeated cross-sectional epidemiological study was performed in 1994–1995 and 2001–2002 following the ISAAC protocol. Both surveys were conducted in the same population of children, randomly selected from the same primary schools in Kaunas.                                                                                                                                                                                                                                                                                                                              | Urban       | ISAAC Q                         | 1879   | 1994-1995 | 6-7y<br>182/914 (19.9)      | 6-7y<br>196/965 (20.3)     |
|                               |           |                                                                                                                                                                                                                                                                                                                                                                                                                                                                                                                                                                               |             |                                 | 2772   | 2001-2002 | 6-7y<br>320/1396 (22.9)     | 6-7y<br>288/1376 (20.9)    |
| Kurosaka et al <sup>S22</sup> | Japan     | We studied the epidemiology of allergic symptoms in six-year-old children attending primary schools throughout Himeji City, Japan, during a two-year period from 2005 to 2006. Himeji City, situated close to the Seto Inland Sea, has a population of about 530,000. The southern area of the city is industrial, with steel manufacture predominating, the central area is urban with a large population, and the northern area is rural with farmlands.                                                                                                                    | Rural/Urban | ISAAC Q                         | 11 013 | 2006      | 6y<br>645/5666 (11.4)       | 6y<br>532/5347 (10.0)      |
| Levesque et al <sup>S23</sup> | Canada    | The Health and Social Survey of Quebec Children and Youth (HSSCY) recruited 189 schools to make up 3 separate samples of approx 1500 children aged 9, 13 and 16 years. The 3 samples were weighted to make them representative of all Quebec children of the same age.                                                                                                                                                                                                                                                                                                        | Rural/Urban | ISAAC Q                         | 3613   | 1999      | 9y<br>(19.2)                | 9y<br>(14.4)               |
| Liao et al <sup>S24</sup>     | Taiwan    | A stratified random sampling method was used (47 schools were sampled randomly from the list of all elementary schools in Changhwa County by 16 districts, areas, and school size). In addition 4 areas in Changhwa county were classified for the comparison of the prevalence, including (1) the “TaiHao Petroleum Company area” with a lot of air-pollution due to a petrochemical company located in the northern part of the county; (2) the “XiZhou area” nearby a huge incinerator located in the southern part of the county; (3) the area of the coastal region; and | U/NR        | ISAAC Q                         | 7040   | 2002      | 6-8y<br>1121/3627<br>(30.9) | 6-8y<br>771/3413<br>(22.6) |

|                                     |                     |                                                                                                                                                                                                                                                                                                                                                                     |             |                  |        |           |                         |                         |
|-------------------------------------|---------------------|---------------------------------------------------------------------------------------------------------------------------------------------------------------------------------------------------------------------------------------------------------------------------------------------------------------------------------------------------------------------|-------------|------------------|--------|-----------|-------------------------|-------------------------|
|                                     |                     | (4) the rest of Changhwa County.                                                                                                                                                                                                                                                                                                                                    |             |                  |        |           |                         |                         |
| Lima et al <sup>S25</sup>           | Brazil              | The districts included in this study correspond to 5.4% of the total population of São Paulo and present high demographic densities, including favelas, with predominantly low incomes <sup>15-17</sup> . Thirty-five exclusively municipal public schools distributed throughout this district whose population presents precarious living conditions were chosen. | Urban       | ISAAC Q          | 3312   | 2002      | 6-7y<br>503/1510 (33.3) | 6-7y<br>455/1671 (27.2) |
| Mavale-Manuel et al <sup>S26</sup>  | Mozambique          | From a total of 126 schools registered in Maputo, 21 primary schools and six secondary schools were randomly selected by stratifying for geographic (urban, suburban and semi-rural) location and inhabitant's density so as to be representative of the distribution of the population in Maputo.                                                                  | Rural/Urban | ISAAC Q          | 5013   | 2004      | 6-7y<br>244/1207 (20.2) | 6-7y<br>251/1176 (21.3) |
| Maziak et al <sup>S27</sup>         | Germany             | This study uses the information collected on two occasions 5 years apart (Phase I 1994/1995, Phase III 1999/2000). A random sample of all schools in the city of Münster was selected, and all pupils in the two grades with the highest proportion of 6–7 and 13–14 year olds were approached.                                                                     | Urban       | ISAAC Q          | 14 569 | 1994-1995 | 6-7y<br>272/1754 (15.5) | 6-7y<br>165/1713 (9.6)  |
|                                     |                     |                                                                                                                                                                                                                                                                                                                                                                     |             |                  |        | 1999-2000 | 6-7y<br>337/1863 (18.1) | 6-7y<br>241/1666 (14.5) |
| Mohammadzadeh et al <sup>S28</sup>  | Iran                | Our sample study had 2 groups: the first group consisted of children aged 6-7 years and in the second group were 12-14 year-old children. The exclusion criteria in this study were mentally retarded children and those visiting rural schools. Each school was a cluster. 59 elementary schools and 62 guidance schools were randomly selected.                   | Urban       | ISAAC Q          | 5933   | 2003      | 6-7y<br>148/1412 (10.5) | 6-7y<br>164/1632 (10.1) |
| Montefort et al <sup>S29</sup>      | The Maltese Islands | Twenty-four state primary schools from Malta and Gozo were randomly chosen. The schools were scattered all over the two islands, and the total number of children within the two school was 4,465. This constituted 59.1% of children within this age group attending state schools in the Maltese Islands.                                                         | Rural/Urban | ISAAC Q          | 3506   | -         | 5-8y<br>(21.4)          | 5-8y<br>(19.9)          |
| Morais-Almeida et al <sup>S30</sup> | Portugal            | A multistep selection strategy was used to obtain a representative sample of the target population.                                                                                                                                                                                                                                                                 | Rural/Urban | ISAAC Q and ARIA | 5018   | 2007      | 3-5y                    | 3-5y                    |

|                             |              |                                                                                                                                                                                                                                                                                                                                                                                                                                                                                                                                                                                       |             |         |                   |      |                          |                         |
|-----------------------------|--------------|---------------------------------------------------------------------------------------------------------------------------------------------------------------------------------------------------------------------------------------------------------------------------------------------------------------------------------------------------------------------------------------------------------------------------------------------------------------------------------------------------------------------------------------------------------------------------------------|-------------|---------|-------------------|------|--------------------------|-------------------------|
|                             |              | First, the number of participants needed from each Portuguese region was defined based on the data from the 2001 Census on 3- to 5-year-old children. Second, Portuguese municipalities were randomly selected until reaching a prespecified number of children, considering that each municipality would provide between 50 and 70 individuals. Finally, kindergartens and parish centers within the selected municipalities were chosen for data collection based on children's distribution, comfort, privacy, and low interference with the usual activities of the participants. |             |         |                   |      | 1131/2561 (44.2)         | 1048/2457 (42.7)        |
| Moyes et al <sup>S31</sup>  | New Zealand  | In each participating centre, schools were selected by sequential random sampling or by using all schools in the sampling frame so that 3000 6- to 7-year-olds and 3000 13- to 14-year-olds were surveyed.                                                                                                                                                                                                                                                                                                                                                                            | Rural/Urban | ISAAC Q | 24 185            | 1993 | 6-7y<br>564/5639 (10.0)  | 6-7y<br>524/5754 (9.1)  |
| Nahhas et al <sup>S32</sup> | Saudi Arabia | A list of all government and private primary schools (aged 6-12y) in Madinah was obtained from the General Directorate of Education in the Madinah region. Schools were then stratified (according to the geographical area and sex) and a random sample of 38 schools (9 schools for girls and 29 for boys) was approached.                                                                                                                                                                                                                                                          | Urban       | ISAAC Q | 5188              | 2008 | 6-8y<br>716/3585 (20.0)  | 6-8y<br>229/1603 (14.3) |
| Okuda <sup>S33</sup>        | Japan        | Two-step stratified random samplings were performed in individual zones. First, 390 of 3,370 places from cities, towns, and villages in Japan were randomly selected by the probability proportional sampling method in proportion to the overall population with respect to age (3 to 79 years) and sex on the basis of the National Census Report in 1995. As the second step, 2 subjects in each of the 7 age and sex groups (14 subjects in total for each factor) were sampled randomly from the resident registration lists of the aforementioned 390 places.                   | Rural/Urban | Other Q | 10 866 (in total) | 2001 | 3-9y<br>12.8% (9.3-16.2) | 3-9y<br>9.7% (6.6-12.7) |

|                                    |                                        |                                                                                                                                                                                                                                                                                                                                                                                                                     |       |                                                |      |           |                          |                          |
|------------------------------------|----------------------------------------|---------------------------------------------------------------------------------------------------------------------------------------------------------------------------------------------------------------------------------------------------------------------------------------------------------------------------------------------------------------------------------------------------------------------|-------|------------------------------------------------|------|-----------|--------------------------|--------------------------|
| Penaranda et al <sup>S34</sup>     | Colombia                               | Among the 4535 registered educational institutions in Bogota schools were selected within neighbourhoods SES 3 and 4 (42% of the overall) for local security reasons. They randomly selected 74 of these schools for the 6–7 year age-group, and 48 for the 13–14 year age-group.                                                                                                                                   | Urban | ISAAC Q                                        | 7085 | 2002      | 6-7y<br>229/1386 (16.5)  | 6-7y<br>319/1794 (17.8)  |
| Peroni et al <sup>S35</sup>        | Italy                                  | Eighteen nursery schools located in the urban area of Verona (North-East part of Italy) were randomly selected from the complete sampling frame of all schools of the area.                                                                                                                                                                                                                                         | Urban | ISAAC Q and SPT                                | 1402 | 2001      | 3-5y<br>142/734 (19.4)   | 3-5y<br>94/668 (14.1)    |
| Rad et al <sup>S36</sup>           | Iran                                   | They divided Urmia city into 11 homogenous clusters and selected 4 clusters by random sampling. A total of 25 schools were selected by systematic random sampling in each selected cluster.                                                                                                                                                                                                                         | Urban | ISAAC Q                                        | 2999 | 2003      | 6-7y<br>174/1450 (12.0)  | 6-7y<br>106/1549 (6.9)   |
| Sanchez-Lerma et al <sup>S37</sup> | Spain                                  | Research team sent a letter to all school principals explaining the objectives of the study and inviting them to participate. Personal interviews with interested principals were held.                                                                                                                                                                                                                             | Urban | ISAAC Q                                        | 1871 | -         | 6-7y<br>42.9 (39.8-46.1) | 6-7y<br>37.4 (34.2-40.5) |
| Selnes et al <sup>S38</sup>        | Norway                                 | 1985: The schools were randomly selected within the three northernmost counties of Norway, Nordland, Troms and Finnmark. The 1995 study was designed as a 10-year follow-up to the study conducted in 1985. The 2000 study was part of an ISAAC-II Europe study. All 9–11 years old children in the counties of Troms and Finnmark were invited to participate.                                                     | U/NR  | Other Q                                        | 1794 | 1985      | 9-11y<br>(18.5)          | 9-11y<br>(14.5)          |
|                                    |                                        |                                                                                                                                                                                                                                                                                                                                                                                                                     |       |                                                | 1432 | 1995      | 9-11y<br>(27.2)          | 9-11y<br>(22.1)          |
|                                    |                                        |                                                                                                                                                                                                                                                                                                                                                                                                                     |       | ISAAC Q                                        | 3853 | 2000      | 9-11y<br>(32.2)          | 9-11y<br>(27.0)          |
| Simoni et al <sup>S39</sup>        | Italy; France; Norway; Sweden; Denmark | The cross-sectional HESE study involved six operational units in five European countries (Siena and Udine, Italy; Reims, France; Oslo, Norway; Uppsala, Sweden; and Aarhus, Denmark). 21 schools (46 classrooms) with heterogeneous characteristics were selected, including a broad age range of buildings and a variety of location characteristics (about half in environmentally more advantaged areas and half | U/NR  | ISAAC Q, Acoustic rhinometry, nasal secretions | 654  | 2004-2005 | Mean 10y<br>(33)         | Mean 10y<br>(31)         |

|                                  |            |                                                                                                                                                                                                                                                                                                                                                                                                                                                                                                                                                                                                                                                                                                                                                                                                                                  |             |         |        |           |                            |                            |
|----------------------------------|------------|----------------------------------------------------------------------------------------------------------------------------------------------------------------------------------------------------------------------------------------------------------------------------------------------------------------------------------------------------------------------------------------------------------------------------------------------------------------------------------------------------------------------------------------------------------------------------------------------------------------------------------------------------------------------------------------------------------------------------------------------------------------------------------------------------------------------------------|-------------|---------|--------|-----------|----------------------------|----------------------------|
|                                  |            | in less advantaged areas).                                                                                                                                                                                                                                                                                                                                                                                                                                                                                                                                                                                                                                                                                                                                                                                                       |             |         |        |           |                            |                            |
| Soto-Quiros et al <sup>S40</sup> | Costa Rica | From a total of 5000 educational centers registered in Costa Rica in 1995, 75 centers representative of the country were selected by random stratification on the basis of geographical location, rural and urban regions, and size.                                                                                                                                                                                                                                                                                                                                                                                                                                                                                                                                                                                             | Rural/Urban | ISAAC Q | 6144   | 1995      | 6-7y<br>435/1478 (29.4)    | 6-7y<br>350/1466 (23.9)    |
| Suh et al <sup>S41</sup>         | Korea      | The clustered random sampling method was used to obtain a representative population of elementary school students in each type of residential area. Residential areas were divided into four groups: metropolitan, provincial, rural, and industrial areas. An industrial area was defined as an industrial complex harboring an elementary school (the study included 17 out of a total of 40 industrial complexes in Korea in the industrial area group). Among 87 elementary schools in industrial area, 25 elementary schools (29%) were randomly selected. In each group except the industrial area, 10% of the elementary schools, of which the number of class was over 3, were randomly selected. Then, one class of each grade (among grades 3 through 5; 8-11 yr old) of each elementary school was randomly selected. | Rural/Urban | ISAAC Q | 30 893 | 2006      | 8-11y<br>4944/13254 (37.3) | 8-11y<br>5239/17639 (29.7) |
| Tai et al <sup>S42</sup>         | Australia  | The Children, Youth and Women's Health Service (CYWHS)(Child and Youth Health Campus) has a state-based community health service that routinely conducts a school entry health check for all preschool (4- to 5-year-old) children in South Australia.                                                                                                                                                                                                                                                                                                                                                                                                                                                                                                                                                                           | U/NR        | ISAAC Q | 1509   | 2006      | 4-5y<br>181/772 (23.4)     | 4-5y<br>132/737 (17.9)     |
| Tamay et al <sup>S43</sup>       | Turkey     | The number of primary school children attending Grade 1 in İstanbul was 211,446. Of those children, 5% from each district were planned to be included in the survey. The number of schools and children were calculated according to the number of children attending Grade 1 in each district.                                                                                                                                                                                                                                                                                                                                                                                                                                                                                                                                  | Urban       | ISAAC Q | 9875   | 2004-2005 | 6-7y<br>1510/4972 (30.4)   | 6-7y<br>1370/4835 (28.3)   |
| Wang et al <sup>S44</sup>        | China      | The questionnaires were distributed to children's                                                                                                                                                                                                                                                                                                                                                                                                                                                                                                                                                                                                                                                                                                                                                                                | Rural/Urban | Other Q | 4530   | 2010-     | 1-8y                       | 1-8y                       |

|                           |        |                                                                                                                                                                                                                                                                                                                                              |             |         |                                             |      |                                    |                                    |
|---------------------------|--------|----------------------------------------------------------------------------------------------------------------------------------------------------------------------------------------------------------------------------------------------------------------------------------------------------------------------------------------------|-------------|---------|---------------------------------------------|------|------------------------------------|------------------------------------|
|                           |        | parents through teachers in kindergartens in three districts (Shapingba, Jiulongpo, Yubei) that were randomly selected from 9 districts of Chongqing city. From the 54 randomly selected kindergartens (15 from Shapingba, 21 from Jiulongpo and 18 from Yubei), 7117 subjects (one parent per child aged from 1–8 years old) were selected. |             |         |                                             | 2011 | Weekly (2.9)<br>Less common (43.0) | Weekly (3.2)<br>Less common (44.5) |
| Wu et al <sup>S45</sup>   | Taiwan | In total, 26418 students from 153 elementary schools in Taipei's 12 administrative districts were investigated.                                                                                                                                                                                                                              | Rural/Urban | ISAAC Q | 24 999                                      | 2007 | 6-7y<br>(47.7)                     | 6-7y<br>(37.8)                     |
| Zhao et al <sup>S46</sup> | China  | All primary schools in the Xuanwu District, Beijing and the Tianshan District, Urumqi were identified. Schools in the two districts were randomly recruited using the random number table until a sample size of around 3500 students in each city was obtained.                                                                             | Urban       | ISAAC Q | 5818<br>(2978 (Beijing)<br>+ 2840 (Urumqi)) | 1996 | 6-7y<br>909/2842 (32.0)            | 6-7y<br>760/2618 (29.0)            |

PR; Prevalence of rhinitis; ISAAC: International Study of Asthma and Allergies in Childhood; Q: questionnaire; SPT: Skin prick test; M: male; F: female; U/NR: unclear/not reported
