# Supplementary material
Source: publisher figshare collection journal article supplement (https://karger.figshare.com/articles/dataset/_/4929773)
Supplement: Supplementary file 1 [file 1 › IAA464324_TableS2.docx]

# **Table S2. Characteristics of the included studies assessing prevalence of rhinitis during and shortly after puberty (11-<18y)**

| **Study Ref**  **(N=43)** | **Country** | **Sampling method** | **Residency** | **Method for assessing PR** | **Sample analysed** | **Study period** | **Rhinitis** | |
| --- | --- | --- | --- | --- | --- | --- | --- | --- |
| **M (%)** | **F (%)** |
| Ahn et al S1 | Korea | Described in Table S1 | Rural/Urban | ISAAC Q | 8115 | 2010 | 13-14y  385/1965 (19.6) | 13-14y  380/2021 (18.8) |
| Al-Ghobain et al S47 | Saudi Arabia | Schools and students were selected using a two-stage cluster sample. In the first stage, a random selection method was used to select 46 secondary schools from a list of 405 schools. To conduct the sampling, we divided Riyadh into four districts (northern, eastern, southern, and western) based on proximity to two major highways. Fifteen percent of the boys schools and 10% of the girls schools were selected from each district based on proportional probability. During the second stage, 3 classes (one per grade level) were selected from each school. Thus, 138 classes were identified. Each class was considered to be a cluster, and all the students in the selected classes constituted the target group. | Urban | ISAAC Q | 3073 | 2010 | 16-18y  527/1504 (35.0) | 16-18y  657/1569 (41.9) |
| Al-Riyami et al S2 | Oman | Described in Table S1 | U/NR | ISAAC Q | 3174 | - | 13-14y  (25.5) | 13-14y  (22.1) |
| Amizadeh et al S48 | Iran | High school children in the city of Kerman, 1840 students (15-18 years old) selected through cluster sampling. | Urban | SFAR | 1511 | 2002 | 15-18y  138/686 (20.1) | 15-18y  153/825 (18.6) |
| Arnedo-Pena et al S49 | Spain | Cross-sectional study including schoolchildren aged 13-14y from 9 centres of which 7 had urban population (Barcelona, Bilbao, Cartagena, Castellon, Madrid, Pamplona and Valencia) and 2 the population was mixed (Asturias and Valladolid). Three centers (Asturias, Valencia y Valladolid) conducted a random sampling to select the schools. | Rural/Urban | ISAAC Q | 30 046 | 2002 | 13-14y  4338/15605 (27.8) | 13-14y  5040/14441 (34.9) |
| Awadh Behbehani et al S50 | Kuwait | Public schools chosen randomly from 5 governorates, 8 schools per govern., 4 and 5th grades (13-14 years) | U/NR | ISAAC Q | 3110 | - | 13-14y  31.4 (29-33.8) | 13-14y  30 (27.8-32.2) |
| Brescianini et al S51 | Italy | A cross-sectional study was carried out in two small semi-urban towns in the south-east of Rome (central Italy),Ciampino and Marino. The study population included 481 students aged 11–15 yr old attending three different secondary schools, located in Ciampino (n= 99) and Marino (n= 382). | Rural/Urban | ISAAC Q | 481 | 2004 | 11-15y  70/237 (29.5) | 11-15y  96/244 (39.3) |
| Chiang et al S52 | Taiwan | Data was collected through cluster sampling from a total of nine elementary schools and five junior high schools in central Taiwan. | U/NR | ISAAC Q | 11 874 | - | 13-15y  1373/3161 (43.4) | 13-15y  1866/4516 (41.3) |
| De Brito et al S53 | Brazil | A cross-sectional study, with two components: a study in prevalence and an inter-case study (rhinitis symptoms) with a comparison group (no rhinitis symptoms), based on information from questionnaires applied in phase 3 of ISAAC in Recife. | Urban | ISAAC Q | 940 | 2002 | 13-14y  36/431 (8.4) | 13-14y  55/509 (10.8) |
| Del-Rio-Navarro et al S10 | Mexico | Described in Table S1 | Urban | ISAAC Q | 6576 | 2005 | 13-14y  957/3243 (29.5) | 13-14y  1147/3333 (34.4) |
| Droma et al S54 | China | All eight public junior high schools accessible in the urban area of Lhasa were recruited for this study and all 3196 students, ranging in age from 13 to 14 years, were invited to participate. | Urban | ISAAC Q | 3190 | 2001 | 13-14y  87/1589 (5.5) | 13-14y  78/1601 (4.9) |
| Fagan et al S55 | USA | Seventh through twelfth grade, students attending school in a Mississippi River community in Illinois were targeted for the survey. All schools in East Moline, Illinois (one high school, five public junior high schools, and two parochial elementary schools) were approached to participate. | Urban | ISAAC Q | 2693 | 1994 | 13-18y  346/1363 (25.4) | 13-18y  515/1330 (38.7) |
| Futamura et al S13 | Japan | Described in Table S1 | Urban | ISAAC Q | 27 917 | 2005 | 11y: 33.0  12y: 35.2  13y: 29.3  14y: 27.0 | 11y:31.9  12y:32.3  13y:27.1  14y: 30.1 |
| Graif et al S56 | Israel | To obtain a representative sample of 13- to 14-year-old schoolchildren, 141 schools were chosen at random from a Ministry of Education list of schools by district. For each school sampled, all eighth grade children were included in the study. | Rural/Urban | ISAAC Q | 10 057 | - | 13-14y  (8.7) | 13-14y  (10.2) |
| Higuchi et al S16 | Japan | Described in Table S1 | Rural/Urban | ISAAC Q | 139 506 | 2008 | 13-14y  26890/47895 (56.1) | 13-14y  26149/47220 (55.4) |
| Hong et al S17 | Korea | Described in Table S1 | Urban | ISAAC Q | 31 201 | 2010 | 10-13y  2451/6052 (40.5) | 10-13y  1825/5868 (31.1) |
| Kahwa et al S18 | Jamaica | Described in Table S1 | Rural/Urban | ISAAC Q | 2017 | 2007 | 13-14y  20/105 (19.0) | 13-14y  28/107 (26.2) |
| Kao et al S19 | Taiwan | Described in Table S1 | U/NR | ISAAC Q | 6190 | 2002 | 13-15y  610/1588 (38.4) | 13-15y  565/1523 (37.1) |
| Kim et al S57 | Korea | A total of 2005 adolescents (aged 11-16 y) were enrolled in this study. All subjects were recruited from 4 high schools in rural areas with citrus orchards and had been living in these areas since infancy. | Rural only | ISAAC Q and SPT | 1727 | - | 16-18y  62/537 (11.6) | 16-18y  171/1190 (14.4) |
| Koffi et al S58 | Ivory Coast | The secondary schools were chosen by simple random sampling of 11 centres of 3 towns: Man (5 schools), Korhogo (3 schools), Abidjan (3 schools). | Urban | ISAAC Q | 3045 | - | 13-14y  Abidjan: 17.9  Man: 20.2  Korhogo: 13.8 | 13-14y  Abidjan: 13.8  Man: 10.7  Korhogo: 5.6 |
| Levesque et al S23 | Canada | Described in Table S1 | Rural/Urban | ISAAC Q | 3613 | 1999 | 13y  (26.6) | 13y  (21.3) |
| 16y  (29.6) | 16y  (26.5) |
| Luna et al S59 | Brazil | In 2006, among the schools who had in their records a number ≤50 adolescents in the age range of the study, 29 were randomly selected, distributed among the six regional administrations, respecting the proportion of students aged 13-14y from every region and thus ensuring the sample is representative of a heterogeneous population. | Urban | ISAAC Q | 3015 | 2006-2007 | 13-14y  494/1372 (36.0) | 13-14y  809/1643 (49.2) |
| 3020 | 2010 | 13-14y  498/1369 (36.4) | 13-14y  539/1392 (38.7) |
| Mavale-Manuel et al S26 | Mozambique | Described in Table S1 | Rural/Urban | ISAAC Q | 5013 | 2004 | 13-14y  479/1238 (38.7) | 13-14y  539/1392 (38.7) |
| Mercer et al S60 | South Africa | Thirty-three schools were selected by stratified random sampling from three socio-politically defined strata to represent the demographic make-up of the greater Cape Town metropolis. | Urban | ISAAC Q | 4336-4663 | 1995 | 13-14y  (30.2) | 13-14y  (30.5) |
| Mohammadzadeh et al S28 | Iran | Described in Table S1 | Urban | ISAAC Q | 5933 | 2003 | 12-14y  164/1380 (11.9) | 12-14y  132/1509 (8.7) |
| Moyes et al S31 | New Zealand | Described in Table S1 | Rural/Urban | ISAAC Q | 24 185 | 1993 | 13-14y  1090/7171 (15.2) | 13-14y  1857/8289 (22.4) |
| 2003 | 13-14y  962/6372 (15.1) | 13-14y  1437/6940 (20.7) |
| Munivrana et al S61 | Croatia | The target population was children aged 12 years 0 months to 14 years 11 months (6th–8th grades of school) from 27 elementary schools. Method of sample randomisation was not described. | Rural/Urban | ISAAC Q | 3111 | 2005 | 12-14y  180/1512 (11.9) | 12-14y  158/1599 (9.9) |
| Musharrafieh et al S62 | Lebanon | A random sample of fifty-five private and public schools from different regions in Lebanon were contacted. Lebanon was witnessing security and political turmoil that followed the assassination of the Prime Minister. Due to these unstable circumstances many schools denied participation in the study. Thus, a convenient sample of 13 schools (3 public and 10 private) from 5 Lebanese provinces accepted to take part in the study. | Urban | ISAAC Q | 3115 | 2005 | 13-14y  571/1512 (37.8) | 13-14y  630/1603 (39.3) |
| Narayana et al S63 | India | Carried out in three schools of Subramanya, a rural area in Dakshina Kannada District of Karnataka state in India. | Rural only | ISAAC Q | 573 | - | 13-15y  33/75 (44) | 13-15y  9/35 (25.7) |
| Nordvall et al S64 | Sweden | The schools were randomized prior to the investigation. For practical reasons, the investigation was started in one school located adjacent to the Children’s hospital. A random order of inclusion was followed for the remainder of the schools, to include approximately 1000 schoolchildren in the study. Nine schools were finally included in the study. | Urban | ISAAC Q | 959 | 1999 | 13-14y  81/476 (17.0) | 13-14y  120/483 (24.8) |
| Owayed et al S65 | Kuwait | A list of intermediate level schools from each of the five governorates in Kuwait was obtained from the Department of Education. Eight schools, four for boys and four for girls, from each governorate were selected using random table. | U/NR | ISAAC Q | 2882 | 2002 | 13-14y  443/1423 (31.1) | 13-14y  352/1459 (24.1) |
| Pac-Sa et al S66 | Spain | The study population were schoolchildren from first and second grade of compulsory secondary education, that is, adolescents aged 13 and 14 years age of all schools and colleges, both public and private or semi-private, from Castellon and surrounding locations. | U/NR | ISAAC Q | 3995 | 2002 | 12-17y  242/1928 (12.6) | 12-17y  412/2067 (19.9) |
| Penaranda et al S34 | Colombia | Described in Table S1 | Urban | ISAAC Q | 7085 | 2002 | 13-14y  380/1772 (21.4) | 13-14y  559/1993 (28.1) |
| Porto Neto et al S67 | Brazil | The students were selected from children who attended the public and private schools of Passo Fundo. Information regarding the number of schools and students was obtained from the records at the Secretariat of Education. A total of 46 schools were identified. From these, 26 schools were chosen by systematic randomized sampling | Urban | ISAAC Q | 2948 | 2002 | 13-14y  339/1435 (23.6) | 13-14y  533/1513 (35.2) |
| Riguera et al S68 | Brazil | In the city, there were 1,214 children in the age group of interest, of whom 1,076 were enrolled between the fifth and eighth grades in three schools (14.6% at a private school, 78.3% at a municipal school and 7.1% at a state school). | Urban | ISAAC Q | 772 | 2007 | 13-14y  111/339 (32.8) | 13-14y  135/402  (33.6) |
| Shamssain et al S69 | United Kingdom | They prepared sampling frames of mixed-sex state schools with more than 100 pupils in each schoolyear. One school was randomly selected from each sampling frame, to produce33 schools for study. | U/NR | ISAAC Q | 3000 | - | 13-14y  415/1510 (27.5) | 13-14y  472/1490 (31.7) |
| Soto-Quiros et al S40 | Costa Rica | Described in Table S1 | Rural/Urban | ISAAC Q | 6144 | 1995 | 13-14y  418/1476 (23.8) | 13-14y  571/1724 (33.1) |
| Sugiyama et al S70 | Japan | According to the ISAAC protocol, all second-grade junior high school students (13–14 years of age) in Utsunomiya City and Tochigi City, including Mibu town, were study targets. The ISAAC questionnaires were distributed in 16 of 22 schools in Utsunomiya City and in eight of nine schools in Tochigi City via the educational committee. | Urban | ISAAC Q | 4466 | 1996 | 13-14y  950/2219 (42.8) | 13-14y  924/2221 (41.6) |
| Tamay et al S71 | Turkey | The number of schools and children were calculated according to the number of children attending Grade 8 in each district. Of those children, 5% from each district were planned. 10,894 children aged 13–14 year in randomly selected 61 primary schools of 32 districts without selection by urban or suburban residence or variations in socioeconomic status were surveyed by the ISAAC questionnaire. | Urban | ISAAC Q | 9991 | - | 13-14y  1916/5164 (37.1) | 13-14y  1909/4749 (40.2) |
| Toledo et al S72 | Brazil | A cross-sectional study of a random sample probability sample by conglomerates was used in which the prevalence of asthma was evaluated in the city of Taubate, São Paulo State, in Brazil. | Urban | ISAAC Q | 809 | - | 13-14y  118/352 (33.5) | 13-14y  178/457 (39.0) |
| Wang et al S73 | Canada | We analysed Canadian data from cross-sectional Phase 3 studies within ISAAC, conducted in two Phase 3A centres (Hamilton, Saskatoon) and three Phase 3B centres (Vancouver, Winnipeg and Halifax). In each centre, the investigators recruited participants using randomly selected schools as sampling units except in Saskatoon where all schools were contacted. | Urban | Other Q. | 8334 | 2003 | 13-14y  711/4071 (17.5) | 13-14y  864/4263 (20.3) |
| Yan et al S74 | Taiwan | Two junior high schools in each of the 12 school districts in Taipei were randomly chosen to enter the study. | Urban | ISAAC Q | 6303 | 2002 | 13-14y  1438/3203 (44.9) | 13-14y  1308/3093 (42.3) |
| Zar et al S75 | South Africa | Schools within the Cape Town metropolitan area were selected by stratified random sampling in both surveys to achieve a representative spread of pupils across the area. The three strata comprised schools with predominantly black (Xhosa speaking) pupils, mixed-race (majority Afrikaans speaking) pupils and white pupils (now integrated to varying degrees). | Urban | ISAAC Q | 5178 | 1995 | 13-14y  582/2088 (27.9) | 13-14y  987/3073 (32.1) |
| 5037 | 2002 | 13-14y  735/2025 (36.3) | 13-14y  1198/2994 (40.0) |

PR; Prevalence of rhinitis; ISAAC: International Study of Asthma and Allergies in Childhood; Q: questionnaire; SFAR: score for allergic rhinitis; SPT: Skin prick test; M: male; F: female.
