# Supplementary material
Source: publisher figshare collection journal article supplement (https://karger.figshare.com/articles/dataset/_/4929773)
Supplement: Supplementary file 1 [file 1 › IAA464324_TableS3.docx]

**Table S3. Characteristics of the included studies assessing prevalence of rhinitis in adults**.

| **Study Ref**  **(N=12)** | **Country** | **Sampling method** | **Residency** | **Method for assessing PR** | **Sample analysed** | **Study period** | **Rhinitis** | |
| --- | --- | --- | --- | --- | --- | --- | --- | --- |
| **M (%)** | **F (%)** |
| Bjerg et al S76 | Sweden | 2 cross-sectional surveys, EXHRS in 1990, Ga2len-Survey in 2008 selected for this analysis were those participants from both surveys that were in the same age range (20-44) and from the same centres using a random sample technique. | Rural only | ECRHS and GA2LEN Q | 8982 | 1990 | 20-44y  950/4339 (21.9) | 20-44y  984/4643 (21.2) |
| 9156 | 2008 | 20-44y  1246/3954  (31.5) | 20-44y  1587/5202 (30.5) |
| Desalu et al S77 | Nigeria | The study area has 12 electoral wards, obtained from the state electoral commission. To select the participants, a multi-stage cluster sampling approach was used based on cluster equality and homogeneity. The electoral wards were defined as clusters and a sample frame containing the list of 12 clusters was constructed. Of these, 9 were selected by simple random sampling. A list of households was drawn up for each cluster and these were also randomly selected. | Urban | ECRHS Q | 733 | 2005-2006 | 18-45y  141/441 (32.0) | 18-45y  76/292 (26.0) |
| Filipiak et al S78 | Germany | The city of Erfurt (former GDR) is located in the centre of Germany and Augsburg in the south. The total population of the two cities are similar. In the city of Augsburg (MONICA study) a total of 311 subjects was selected in each sex and 10-year age group from the population register of the city. In the city of Erfurt (Stage II ECRHS study) subjects were randomly selected. | Urban | ECRHS Q and IgE/SPT | 3222 | 1991-1992  Erfurt | 25-64y  (9.5) | 25-64y  (9.3) |
| 1994-1995  Ausburg | 25-64y  (15.0) | 25-64y  (18.9) |
| Hannaford et al S79 | United Kingdom | A postal questionnaire was sent to a random sample of 1000 residents in each of the 12 mainland Health Boards of Scotland (with Orkney and Shetland residents included in the Grampian sample) and 100 residents in the Western Isles. | Rural/Urban | Other Q | 15 788 | 1998 | 30-44: 20.2  45-59: 12.2  60-74: 8.8  75+: 8.9 | 30-44: 24.3  45-59: 15.1  60-74: 9.5  75+: 6.8 |
| Klossek et al S80 | France | This cross-sectional survey was carried out in 2006 in a French population-based sample. The data were collected by a polling organization in 3 waves using face-to-face interviews at home. | Urban | SFAR and ARIA | 10 038 | 2006 | 18-65y  1179/4756 (24.8) | 18-65y  1906/5282 (36.1) |
| Konno et al S81 | Japan | A population-based, cross-sectional study was conducted with Japanese subjects 20–79 years of age, living in ten different areas of Japan. Detailed methods for selecting areas, participants were not described but a reference was provided. | Urban | ECRHS Q | 22 819 | 2006-2007 | 20-29y: 48.2 (45.7-50.7)  30-39y: 45.2 (42.9-47.4)  40-49y: 40.9 (38.6-43.2)  50-59y: 32.9 (31.0-34.9)  60-69y: 25.2 (23.4-27.1)  70-79y: 18.0 (16.1-19.9) | 20-29y: 47.8 (45.2-50.4)  30-39y: 49.7 (47.5-51.9)  40-49y: 50.0 (47.8-52.2)  50-59y: 38.7 (36.8-40.6)  60-69y: 29.6 (27.7-31.4)  70-79y: 20.1 (18.2-22.0) |
| Kurt et al S82 | Turkey | 14 cities were selected from different geographical regions of the country. Schools were selected randomly from rural and urban areas of each city. | Rural/Urban | Other Q | 25 843 | 2000 | Mean 40y  Rural: 17.5 (16.7–18.2)  Urban: 11.7 (11.4–12.0) | Mean 35y  Rural: 21.2 (20.4–22.0)  Urban: 17.0 (16.4–17.6) |
| Lindgren et al S83 | Sweden | In 2000, a questionnaire was sent to a total of 11933 randomly selected individuals aged 18–77 and 9319 (78%) answered. The study population originated from two different study populations, 5039 individuals (response rate 71%) from a new random selection, and 4280 individuals (response rate 87%) constituting a follow-up group from an earlier selection. | Rural/Urban | Other Q | 9319 | 2000 | 18-77y  AR: 800/4341 (18.4)  NAR: 266/4341 (6.1) | 18-77y  AR: 1064/4975 (21.4)  NAR: 339/4975 (8.0) |
| Morais-Almeida et al S84 | Portugal | A stratified (by gender, age, and region), multistep defined sample was used. In a first phase, the number of needed participants from each Portuguese region was defined based on the data from the 2001 Portuguese Census. In a second phase, municipalities were selected within each of the five Portuguese regions until reaching a prespecified number of elder subjects in proportion to the sample size. The final selection was made using a random-route methodology, where households and nursing homes were included, in each location. | Rural/Urban | ECRHS Q. VAS scale and ARIA | 3678 | 2008 | 65+y  432/1527 (28.3) | 65+y  665/2151 (30.9) |
| Okuda S33 | Japan | Described in Table S1 | Rural/Urban | Other Q | 10 866 (in total) | 2001 | 20-29y: 22.1 (10.4-27.7)  30-39y: 22.1 (17.3-26.8)  40-49y: 24.8 (20.2-29.4)  50-59y: 14.7 (10.7-18.6)  60-79y: 10.6 (7.5-13.7) | 20-29y: 21.9 (16.9-26.8)  30-39y: 25.8 (21.5-30.1)  40-49y: 26.1 (21.8-30.3)  50-59y: 24.1 (19.8-28.4)  60-79y: 10.6 (7.6-13.6) |
| Song et al S85 | Korea | Possible subjects were recruited using a stratified random sampling method and were invited by postal mail and then by telephone to participate. | Urban | Other Q and SPT | 984 | 2006 | ≥65y  121/434 (27.9) | ≥65y  131/550 (23.8) |
| Sonomjamts et al S86 | Mongolia | Ten family clinics out of 52 were selected randomly which were estimated to cover approx 20000 population at large. 5 family clinics are located in the centre of the city and other 5 clinics are selected peripheral area of the city. Total of approx 1200 adults aged 20 years and over were planned to be randomly selected. The household registration was continued until the desired sample size of qualified respondents was reached. | Urban | ECRHS Q, WHO Protocol for Assessment of P of Major RD and GINA | 1021 | - | ≥20y  139/606 (22.9) | ≥20y  145/595 (24.4) |

PR; Prevalence of rhinitis; RD: respiratory diseases; ECRHS: European Community Respiratory Health Survey; Q: questionnaire; SFAR: score for allergic rhinitis; GINA: Global Initiative for Asthma; ARIA: Allergic Rhinitis and its Impact on Asthma; VAS analogue scale: Visual analogue Scale for Rhinitis; SPT: Skin prick test; M: male; F: female.
