# Supplementary material
Source: publisher figshare collection journal article supplement (https://karger.figshare.com/articles/dataset/_/4929773)
Supplement: Supplementary file 1 [file 1 › IAA464324_TableS4.docx]

# **Table S4. Study quality assessment of the included studies**

| **Study Ref** | **Representativity** | | | **Reliability** | **Quality rating score**  Max= 5 |
| --- | --- | --- | --- | --- | --- |
| **Sampling method**  Probability sampling (including: simple random, systematic, stratified g, cluster, two-stage and multi-stage sampling)=1  Non-probability sampling (including: purposive, quota , convenience and snowball sampling)=0 | **Sample size**  Calculated**=**1  Not calculated= 0 | **Response rate**  Reported=1  Not reported or if RR<60% =0 | **Data collection method**  ISAAC/ECHRS=2  Non-ISAAC/ECHRS but validated questionnaires=1  Non- validated questionnaires or Not clearly defined=0 |
| Ahn et al S1 | 1 | 0* | 1 | 2 | 4 |
| Al-Ghobain et al S47 | 1 | 1 | 1 | 2 | 5 |
| Al-Riyami et al S2 | 1 | 0* | 1 | 2 | 4 |
| Amarasekera et al S3 | 1 | 0 | 1 | 2 | 4 |
| Amizadeh et al E48 | 1 | 0 | 1 | 1 | 3 |
| Annesi-Maesano et al S4 | 1 | 1 | 0 | 2 | 4 |
| Anthracopoulos et al S5 | 1 | 1 | 1 | 0 | 3 |
| Arnedo-Pena et al S49 | 1 | 0* | 1 | 2 | 4 |
| Arnedo-Pena et al S6 | 1 | 1 | 1 | 2 | 5 |
| Awadh Behbehani et al S50 | 1 | 0* | 0 | 2 | 3 |
| Backer et al S7 | 1 | 0* | 1 | 2 | 4 |
| Bjerg et al S76 | 1 | 1 | 1 | 1 | 4 |
| Brescianini et al S51 | 0 | 0* | 0 | 2 | 2 |
| Castro et al S8 | 0 | 0 | 1 | 2 | 3 |
| Chiang et al S52 | 1 | 1 | 1 | 2 | 5 |
| De Brito et al S53 | 1 | 1 | 0 | 2 | 4 |
| Dell et al S9 | 1 | 1 | 1 | 2 | 5 |
| Del-Rio-Navarro et al S10 | 1 | 0* | 1 | 2 | 4 |
| Desalu et al S77 | 1 | 1 | 1 | 1 | 4 |
| Droma et al S54 | 1 | 0* | 1 | 2 | 4 |
| Duggan et al S11 | 1 | 1 | 1 | 2 | 5 |
| Fagan et al S55 | 0 | 0 | 1 | 2 | 3 |
| Falade et al S12 | 1 | 1 | 1  RR given for boys (87%) and girls (77%) | 2 | 5 |
| Filipiak et al S78 | 1 | 1 | 1 | 1 | 4 |
| Futamura et al S13 | 1 | 1 | 1 | 2 | 5 |
| Garcia-Marcos et al S14 | 1 | 1 | 1 | 2 | 5 |
| Graif et al S56 | 1 | 1 | 1 | 2 | 5 |
| Hahm et al S15 | 1 | 1 | 1 | 2 | 5 |
| Hannaford et al S79 | 1 | 0 | 1 | 2 | 4 |
| Higuchi et al S16 | 1 | 1 | 1 | 2 | 5 |
| Hong et al S17 | 1 | 1 | 0 | 2 | 4 |
| Kahwa et al S18 | 1 | 1 | 1 | 2 | 5 |
| Kao et al S19 | 1 | 0 | 1 | 2 | 4 |
| Kim et al S57 | 1 | 0 | 1 | 2 | 4 |
| Klossek et al S80 | 1 | 0 | 1 | 1 | 3 |
| Koffi et al S58 | 1 | 1 | 1 | 1 | 4 |
| Kong et al S20 | 1 | 0 | 1 | 2 | 4 |
| Konno et al S81 | 1 | 0 | 1 | 1 | 3 |
| Kudzyte et al S21 | 1 | 0 | 1 | 2 | 4 |
| Kurosaka et al S22 | 1 | 0 | 1 | 2 | 4 |
| Kurt et al S82 | 1 | 0 | 1 | 1 | 3 |
| Levesque et al S23 | 0 | 1 | 1 | 2 | 4 |
| Liao et al S24 | 1 | 0 | 1 | 2 | 4 |
| Lima et al S25 | 0 | 0 | 1 | 2 | 3 |
| Lindgren et al S83 | 1 | 0 | 1 | 0 | 2 |
| Luna et al S59 | 1 | 0 | 1 | 2 | 4 |
| Mavale-Manuel et al S26 | 1 | 0 | 1 | 2 | 4 |
| Maziak et al S27 | 1 | 0 | 1 | 2 | 4 |
| Mercer et al S60 | 1 | 0 | 1 | 2 | 4 |
| Mohammadzadeh et al E28 | 1 | 0* | 1 | 2 | 4 |
| Montefort et al E29 | 1 | 0 | 1 | 2 | 4 |
| Morais-Almeida et al S30 | 1 | 1 | 1 | 2 | 5 |
| Morais-Almeida et al S84 | 1 | 1 | 1 | 2 | 5 |
| Moyes et al S31 | 1 | 0 | 1 (one center had a RR< 60% and was excluded from the analysis) | 2 | 4 |
| Munivrana et al S61 | 0 | 0 | 1 | 2 | 3 |
| Musharrafieh et al S62 | 0 (random sampling originally planned but due to war issues, a convenient sample was used) | 0 | 0 | 2 | 2 |
| Nahhas et al S32 | 1 | 0 | 1 (RR given for boys (86.2%) and girls 84.6%) | 2 | 4 |
| Narayana et al S63 | 0 | 0 | 0 | 2 | 2 |
| Nordvall et al S64 | 0 (schools were randomized except for one which was chosen by convenience) | 0 | 1 | 2 | 3 |
| Okuda S33 | 1 | 0 | 0 (RR= 53.7%) | 1 | 2 |
| Owayed et al S65 | 1 | 0 | 1 | 2 | 4 |
| Pac-Sa et al S66 | 0 | 0 | 1 | 2 | 3 |
| Penaranda et al S34 | 1 | 0 | 1 | 2 | 4 |
| Peroni et al S35 | 1 | 0 | 1 | 2 | 4 |
| Porto Neto et al S67 | 1 | 1 | 1 | 2 | 5 |
| Rad et al S36 | 1 | 0* | 1 | 2 | 4 |
| Riguera et al S68 | 0 | 0 | 1 | 2 | 3 |
| Sanchez-Lerma et al S37 | 0 | 1 | 1 (RR= 60.6%) | 2 | 4 |
| Selnes et al S38 | 1 | 0 | 1 | 0 (1985 and 1995) and 2 (2000) | 2 (1985; 1995) and 4 (2000) |
| Shamssain et al S69 | 1 | 1 | 1 | 2 | 5 |
| Simoni et al S39 | 0 | 0 | 1 | 2 | 3 |
| Song et al S85 | 1 | 0 | 1 | 1 | 4 |
| Sonomjamts et al S86 | 1 | 0 (desired but not calculated) | 0 | 2 | 3 |
| Soto-Quiros et al S40 | 1 | 0 | 1 | 2 | 4 |
| Sugiyama et al S70 | 0 | 0 | 0 | 2 | 2 |
| Suh et al S41 | 1 | 0 | 1 (RR= 61.8%) | 2 | 4 |
| Tai et al E42 | 0 | 0 | 1 (RR= 65%) | 2 | 3 |
| Tamay et al S43 | 1 | 1 | 1 | 2 | 5 |
| Tamay et al S71 | 1 | 1 | 1 | 2 | 5 |
| Toledo et al E72 | 1 | 1 | 1 | 2 | 5 |
| Wang et al S44 | 1 | 0 | 1 | 1 | 3 |
| Wang et al S73 | 1 | 0* | 0 (only in one center RR>60%. Acknowledged in limitations) | 2 | 3 |
| Wu et al S45 | 1 (all schools in Taipei) | 0 | 1 | 2 | 4 |
| Yan et al S74 | 1 | 0 | 1 | 2 | 4 |
| Zar et al S75 | 1 | 0 | 1 | 2 | 4 |
| Zhao et al S46 | 1 | 0 (approx. size given but rationale not provided) | 1 | 2 | 4 |

*In accordance with the ISAAC committee recommendation, a sample size of 3000 schoolchildren was used.
